# Supplementary material
Source: MDPI journal article supplement (https://www.mdpi.com/1660-4601/12/2/1387)
Supplement: s1 [file s1]

## Comparison of the Hospital Arrival Time and Differences in Pain Quality between Diabetic and Non-Diabetic STEMI Patients

**Table S1.** Frequency of affected coronary arteries and duration of hospitalization in diabetic and non diabetic group of patients.

|                                    | Non-Diabetic | Diabetic   | <i>p</i> value |
|------------------------------------|--------------|------------|----------------|
| LAD (%)                            | 53           | 39         | NS             |
| Cx (%)                             | 26           | 34         | NS             |
| RCA (%)                            | 21           | 25         | NS             |
| Duration of hospitalization (days) | 7 ± 2.9      | 7.62 ± 3.5 | NS             |

Notes: LAD, left coronary artery; Cx, circumflex artery; RCA, right coronary artery; NS, not significant.

© 2015 by the authors; licensee MDPI, Basel, Switzerland. This article is an open access article distributed under the terms and conditions of the Creative Commons Attribution license (<http://creativecommons.org/licenses/by/4.0/>).
